# Supplementary material
Source: PubMed Central journal article supplement (PMC556268)

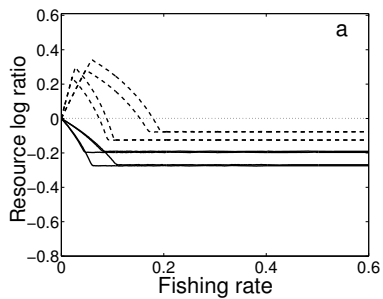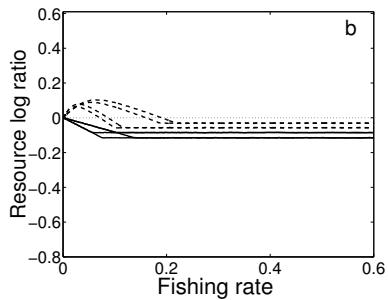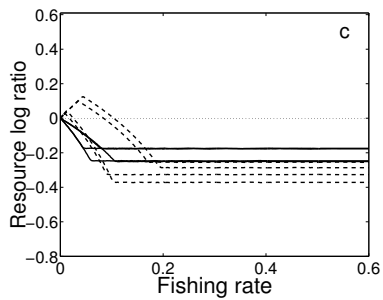

Supplement: pnas_102_15_5443__2.pdf [file pnas_102_15_5443__2.pdf]
